# Supplementary material for: Spatial Heterogeneity of Soil Bacterial Community Structure and Enzyme Activity along an Altitude Gradient in the Fanjingshan Area, Northeastern Guizhou Province, China
Source: MDPI journal article supplement (doi:10.3390/life12111862), 2022-11-12
Supplement: s1 [file s1]

**Table S2 Spearman's correlation coefficient analysis of soil pH, enzyme activity and bacterial community richness**

| Indicator | Genus of bacteria            | R2 adj  | Genus of bacteria                | R2 adj |
|-----------|------------------------------|---------|----------------------------------|--------|
| pH        | DA101                        | 0.02*   | JG37_AG_70                       | 0.01** |
|           | Allobaculum                  | 0.05*   | Bacillus                         | 0.03*  |
|           | Candidatus_Xiphinematobacter | 0.24    | Delftia                          | 0.03*  |
|           | Rhodoplanes                  | 0.29    | Staphylococcaceae_Staphylococcus | 0.03*  |
|           | Candidatus_Solibacter        | 0.52    | Proteus                          | 0.04*  |
|           | Streptococcus                | 0.61    | Pedomicrobium                    | 0.52   |
|           | Bradyrhizobium               | 0.69    | Pseudomonadaceae_Pseudomonas     | 0.6    |
|           | Candidatus_Koribacter        | 0.79    | Other                            | 0.77   |
|           | Burkholderia                 | 0.8     | Rhodanobacter                    | 0.84   |
|           | Ralstonia                    | 0.88    | Sphingomonas                     | 0.94   |
| S-SC      | Candidatus_Xiphinematobacter | 0.01**  | JG37_AG_70                       | 0.1    |
|           | Bradyrhizobium               | 0.9     | Proteus                          | 0.17   |
|           | Streptococcus                | 0.89    | Pseudomonadaceae_Pseudomonas     | 0.25   |
|           | Ralstonia                    | 0.7     | Delftia                          | 0.35   |
|           | Candidatus_Solibacter        | 0.54    | Staphylococcaceae_Staphylococcus | 0.35   |
|           | Candidatus_Koribacter        | 0.31    | Bacillus                         | 0.55   |
|           | Burkholderia                 | 0.26    | Pedomicrobium                    | 0.65   |
|           | DA101                        | 0.21    | Sphingomonas                     | 0.66   |
|           | Allobaculum                  | 0.16    | Other                            | 0.68   |
|           | Rhodoplanes                  | 0.07    | Rhodanobacter                    | 0.82   |
| S-CAT     | DA101                        | 0.01**  | Pseudomonadaceae_Pseudomonas     | 0.03*  |
|           | Ralstonia                    | 0.02*   | Pedomicrobium                    | 0.02*  |
|           | Rhodoplanes                  | 0.04*   | Rhodanobacter                    | 0.03*  |
|           | Bradyrhizobium               | 0.1     | Other                            | 0.24   |
|           | Burkholderia                 | 0.1     | Delftia                          | 0.62   |
|           | Streptococcus                | 0.17    | Staphylococcaceae_Staphylococcus | 0.62   |
|           | Candidatus_Xiphinematobacter | 0.19    | Sphingomonas                     | 0.76   |
|           | Candidatus_Solibacter        | 0.25    | Proteus                          | 0.77   |
|           | Candidatus_Koribacter        | 0.31    | Bacillus                         | 0.81   |
|           | Allobaculum                  | 0.81    | JG37_AG_70                       | 0.98   |
| S-UE      | Candidatus_Solibacter        | 0.01*** | Ralstonia                        | 0.97   |
|           | Burkholderia                 | 0**     | Candidatus_Koribacter            | 0.36   |
|           | Pedomicrobium                | 0.01**  | DA101                            | 0.22   |
|           | Bradyrhizobium               | 0.04*   | Sphingomonas                     | 0.93   |
|           | Allobaculum                  | 0.03*   | Pseudomonadaceae_Pseudomonas     | 0.69   |
|           | Rhodoplanes                  | 0.02*   | Bacillus                         | 0.17   |
|           | Candidatus_Xiphinematobacter | 0.02*   | Delftia                          | 0.17   |

|       |                              |        |                                  |      |
|-------|------------------------------|--------|----------------------------------|------|
|       | Streptococcus                | 0.02*  | Staphylococcaceae_Staphylococcus | 0.17 |
|       | Proteus                      | 0.03*  | JG37_AG_70                       | 0.11 |
|       | Rhodanobacter                | 0.02*  | Other                            | 0.06 |
| S-ACP | Ralstonia                    | 0.55   | Streptococcus                    | 0.67 |
|       | Rhodoplanes                  | 0.15   | JG37_AG_70                       | 0.66 |
|       | Candidatus_Xiphinematobacter | 0.04*  | Sphingomonas                     | 0.65 |
|       | DA101                        | 0.01** | Delftia                          | 0.57 |
|       | Candidatus_Solibacter        | 0.01*  | Staphylococcaceae_Staphylococcus | 0.57 |
|       | Burkholderia                 | 0**    | Pseudomonadaceae_Pseudomonas     | 0.41 |
|       | Pedomicrobium                | 0**    | Other                            | 0.38 |
|       | Bacillus                     | 0.94   | Candidatus_Koribacter            | 0.25 |
|       | Proteus                      | 0.81   | Rhodanobacter                    | 0.25 |
|       | Allobaculum                  | 0.77   | Bradyrhizobium                   | 0.06 |

Note: \* indicates statistical significance at 0.05 level; \*\* indicates statistical significance at 0.01 level.
