# Supplementary material for: Spatial Heterogeneity of Soil Bacterial Community Structure and Enzyme Activity along an Altitude Gradient in the Fanjingshan Area, Northeastern Guizhou Province, China
Source: MDPI journal article supplement (doi:10.3390/life12111862), 2022-11-12
Supplement: s1 [file s1]

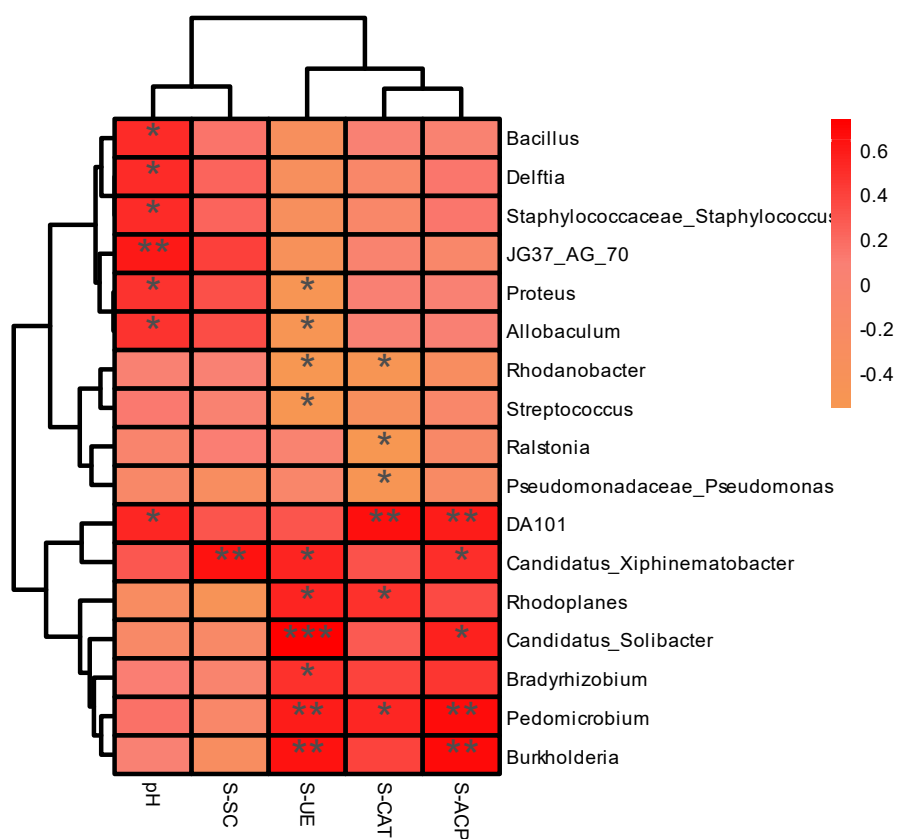

**Figure S2. Heatmap plot of bacterial diversity versus soil pH and soil enzyme activity** (X-axis is environmental factor, Y-axis is species. R-values and P-values were obtained by rank correlation calculations. R-values are shown in different colors in the plots. P-values are marked with \* signs with \* represents  $0.01 \leq P < 0.05$ , \*\* represents  $0.001 \leq P < 0.01$ , \*\*\* represents  $P < 0.001$ )
