# Supplementary material for: Spatial Heterogeneity of Soil Bacterial Community Structure and Enzyme Activity along an Altitude Gradient in the Fanjingshan Area, Northeastern Guizhou Province, China
Source: MDPI journal article supplement (doi:10.3390/life12111862), 2022-11-12
Supplement: s1 [file s1]

**Table S1 Data of soil pH and enzyme activity**

| Indicator | Range         | Mean±SD      | Units  |
|-----------|---------------|--------------|--------|
| pH        | 4.56-5.28     | 4.87±0.05    | —      |
| S-SC      | 22.84-48.35   | 30.20±2.42   | mg/g/d |
| S-CAT     | 18.52-25.40   | 19.56±0.82   | umol/g |
| S-UE      | 237.78-707.24 | 464.14±36.68 | ug/g/d |
| S-ACP     | 44.85-57.18   | 51.36±1.41   | umol/g |
