# Supplementary material for: Spatial Heterogeneity of Soil Bacterial Community Structure and Enzyme Activity along an Altitude Gradient in the Fanjingshan Area, Northeastern Guizhou Province, China
Source: Life (Basel). 2022 Nov 12;12(11):1862. doi: 10.3390/life12111862 (PMC9698955; doi:10.3390/life12111862)
Supplement: Supplementary file 1 [file life-12-01862-s001.zip]

Archive with 5 entries (5 files):
- figS1.pdf
- figS2.pdf
- figS3.pdf
- tableS1.pdf
- tableS2.pdf
