# Supplementary figures and images for: Spatial Heterogeneity of Soil Bacterial Community Structure and Enzyme Activity along an Altitude Gradient in the Fanjingshan Area, Northeastern Guizhou Province, China
Source: MDPI journal article supplement (doi:10.3390/life12111862), 2022-11-12

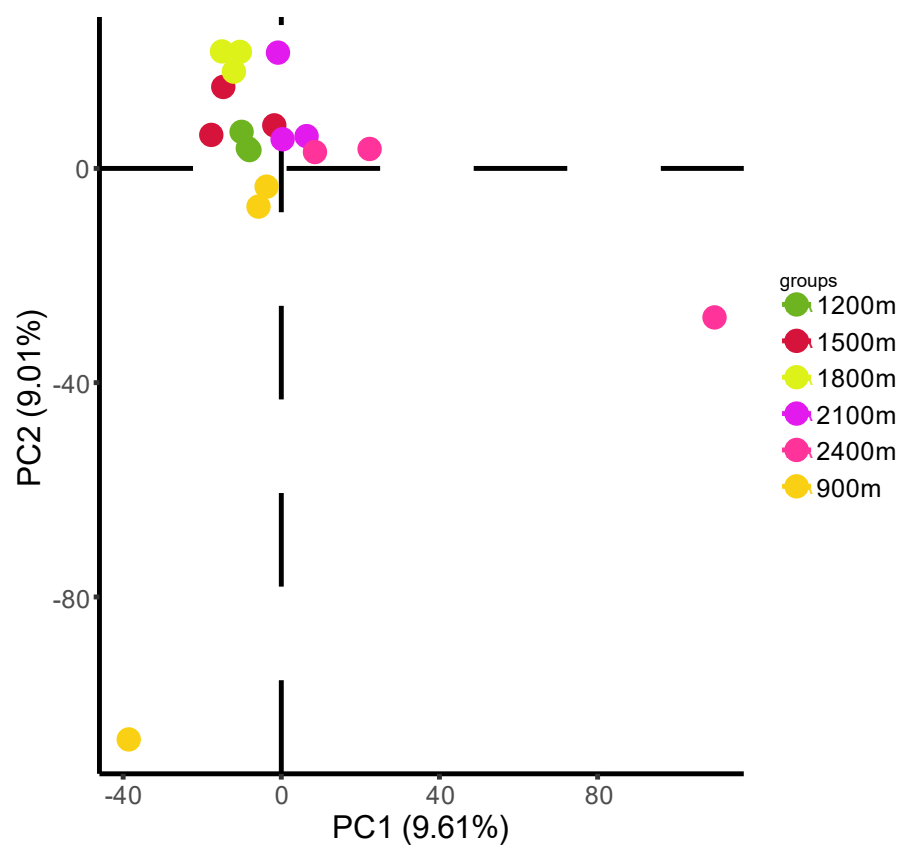

**Figure S3 Results of PCA analysis of MetaCyc pathway**

Supplement: s1 [file s1]

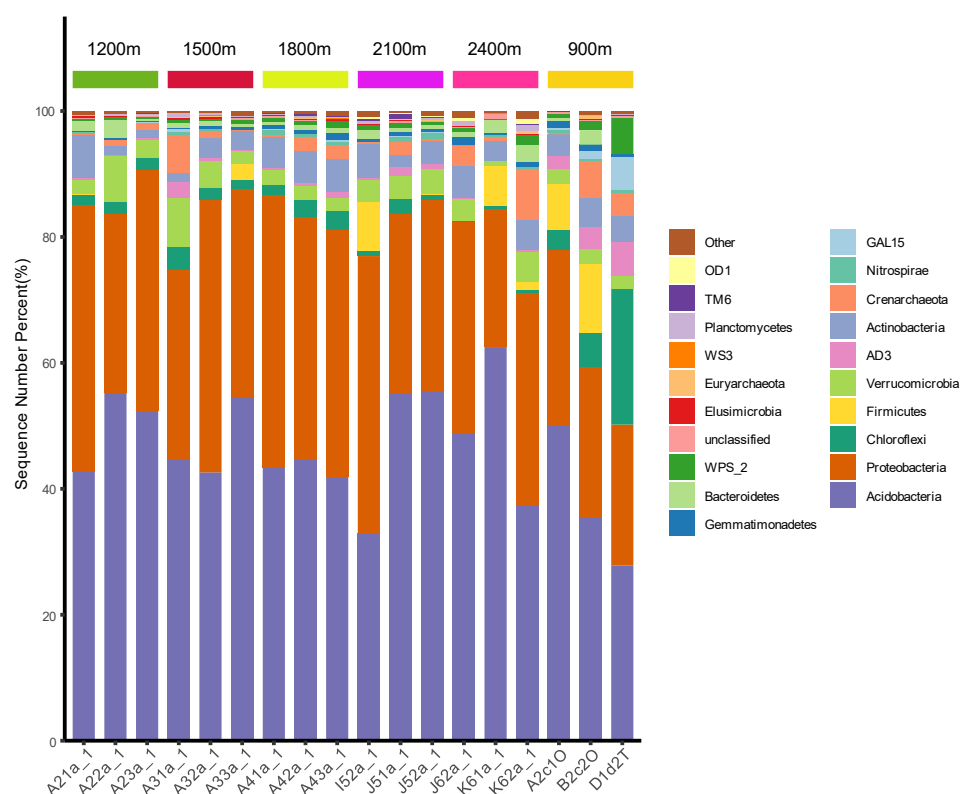

**Figure S1. Histogram of bacterial community structure percentage stacking at the phylum level**

Supplement: s1 [file s1]
